# Supplementary material for: Multidrug-resistant pathogens in hospitalised patients coming from the community with pneumonia: a European perspective: Table 1
Source: HighWire-hosted journal article supplement (doi:10.1136/thoraxjnl-2013-203384), 2013-06-17

## Pneumonia Severity Index

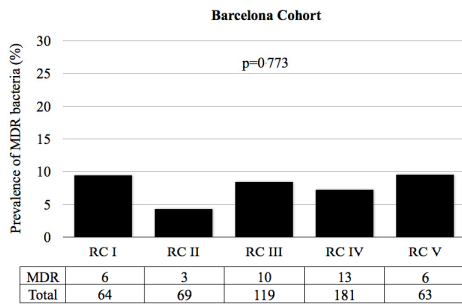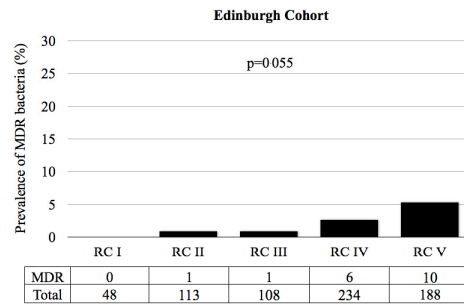

## Mechanical ventilation (MV)

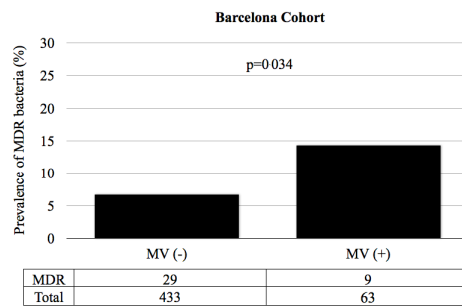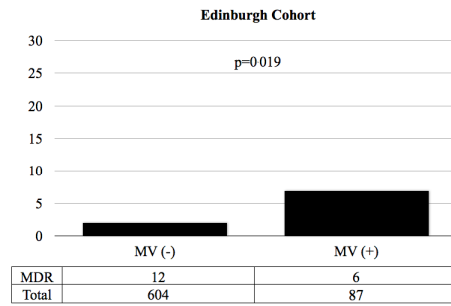

## Shock

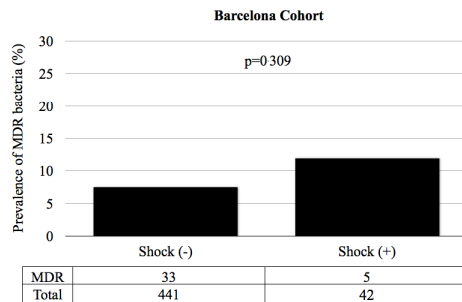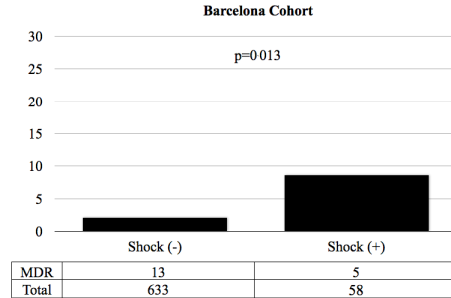

## Aliberti Score

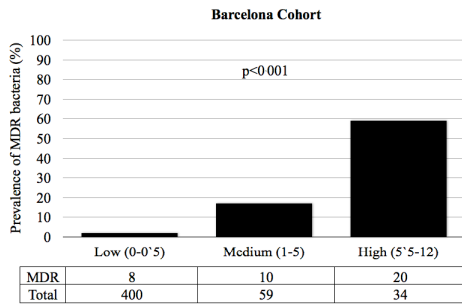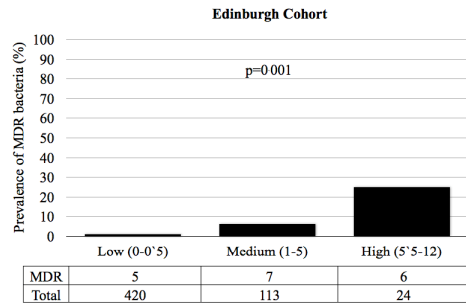

## Shorr Score

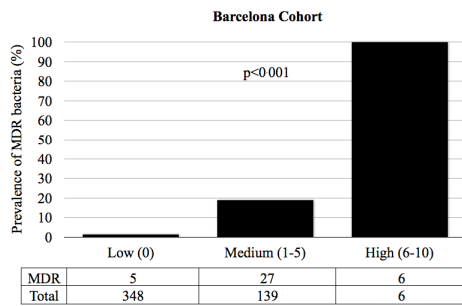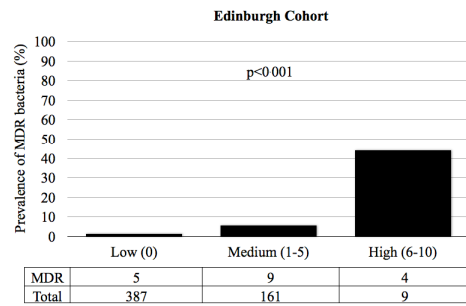

## HCAP classification

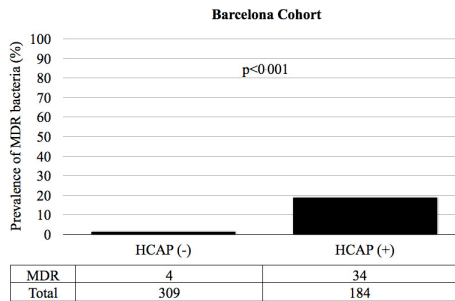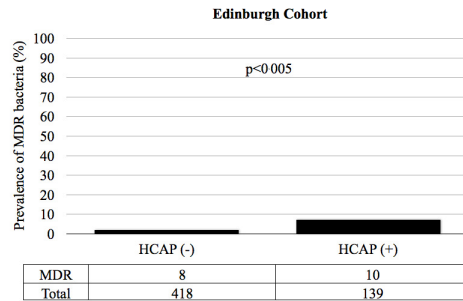

Supplement: thoraxjnl-2013-203384supp_figures.pdf [file thoraxjnl-2013-203384supp_figures.pdf]
